# Supplementary material
Source: publisher figshare collection journal article supplement (https://diabetesjournals.figshare.com/articles/dataset/_/12821411)
Supplement: Supplementary file 1 [file 1]

Supplementary Table 1. PCR primers for genotyping

| Gene         | Primer Sequence (F)                 | Primer Sequence (R)                   |
|--------------|-------------------------------------|---------------------------------------|
| Tm1a or Tm1c | CGAAGCAAAGCTATGGCCCTGAGCGATCTGGTGCT | CGTGCTTAATGCTGTACAGGTAGCTGGGAATGATGGG |
| RIP-Cre      | GCATTACCGGTCGATGCAACGAGTGATGAG      | CCCAAAGTGTTCAGTGGCAGA                 |

Supplementary Table 2. Primers for real-time PCR analysis

| Gene name      | Primer Sequence (F)      | Primer Sequence (R)        |
|----------------|--------------------------|----------------------------|
| <i>Aldh1a3</i> | TCTGGGAATGGCAGAGAACT     | TTGATGGTGACGGTTTTTCAC      |
| <i>b-actin</i> | GTGATGGTGGGAATGGGTCA     | TTTGATGTCACGCACGATTTCC     |
| <i>Ccna2</i>   | TCCTTGCTTTTGAATTGGCT     | ATGACTCAGGCCAGCTCTGT       |
| <i>Ccnd1</i>   | GCGTACCCTGACACCAATCT     | CACAACTTCTCGGCAGTCAA       |
| <i>Ccnd2</i>   | GCTATGGAGCTGCTGTGCT      | CCAAGAAACGGTCCAGGTAA       |
| <i>GK</i>      | ATGTCACAAGGAGCCAGGCCCAGA | ACTTCTGAGCCTTCTGGGGTGGA    |
| <i>Ins1</i>    | CAGCCCTTAGTGACCAGCTA     | ATGCTGGTGCAGCACTGATC       |
| <i>Ins2</i>    | TCCGCAACAATCAAAAACCAT    | GCTGGGTAGTGGTGGGTCTA       |
| <i>MafA</i>    | TTTCCTCGGCAGCGTCCACTTGTA | GGGGGTTCCTCCGGGTTTTCTAAT   |
| <i>MafB</i>    | GAGCGCTAACTGCAAACTCC     | CAGTGCAACCGAATCCTCTT       |
| <i>Ngn3</i>    | CTGCGCATAGCGGACCACAGCTTC | CTTCACAAGAAGTCTGAGAACACCAG |
| <i>Nkx6.1</i>  | TACTTGGCAGGACCAGAGAG     | CGCTGGATTTGTGCTTTTTTC      |
| <i>Pcna</i>    | TGCTCTGAGGTACCTGAACT     | TGCTTCCTCATCTTCAATGT       |
| <i>Pdx1</i>    | CCAAAACCGTCGCATGAAGTG    | CTCTCGTGCCCTCAAGAATTTTC    |
